# Supplementary material
Source: publisher site journal article supplement (https://www.spandidos-publications.com/1667/downloadSupplementary)
Supplement: Supplementary file 1 [file downloadSupplementary]

## Sheet: Regulator_Effects
Table SVII. Regulator effects.
ID	Consistency score	Node total	Regulator total	Regulators	Target total	Target molecules in dataset	Disease & function total	Diseases & functions
1	8.043	21	6	CD28,CHUK,IFNAR1,IKBKG,INSR,RIPK2	13	AXL,CXCL12,CXCL2,CYP1B1,HSPA1A/HSPA1B,IL33,IRF7,SERPINE1,SPP1,STAT1,STAT3,UCP2,VCAM1	2	ADHESION OF ENDOTHELIAL CELLS, RECRUITMENT OF MYELOID CELLS
2	6.64	17	3	ACKR2,IRF5,TRIM24	12	ADAR,AGRN,CDKN1A,CXCL2,IRF7,ISG15,JAK2,LGALS3,SERPINE1,SPP1,STAT1,TGFBI	2	BINDING OF ENDOTHELIAL CELLS, ORGANISMAL DEATH
3	4.899	11	4	CHUK,OSM,STAT1,XBP1	6	ADAM10,AXL,CXCL12,CXCL2,SPP1,VCAM1	1	ADHESION OF ENDOTHELIAL CELLS
4	3.92	54	6	CNTF,IFNAR1,IKBKG,Interferon alpha,JAK1,SOCS3	44	ADAM19,ADAR,ATP2A2,AXL,BCL2L11,CCND1,CCND2,CD14,CDKN1A,CLU,CXCL12,CXCL2,DAG1,DYNLT1,FASN,HMGCR,HSPA1A/HSPA1B,IDI1,IFITM3,IL6ST,IRF7,IRS2,ISG15,ITGB1,JAK2,NF2,NID1,SCD,SDC1,SERPINA3,SERPINB1,SERPINE2,SGK1,SLC18A3,SLC1A3,SOD3,SPRY4,SQLE,STAT1,STAT3,STAT6,TBC1D10A,TRAF6,VCAM1	4	BREAST OR COLORECTAL CANCER,GASTROINTESTINAL TRACT CANCER,RECRUITMENT OF MYELOID CELLS,TRANSPORT OF MOLECULE
5	3.569	45	4	IFNAR1,IKBKG,Interferon alpha,SAMSN1	38	ADAM19,ADAR,ATP2A2,AXL,CCND1,CCND2,CDKN1A,CLU,CXCL12,CXCL2,DAB2,DAG1,FASN,HMGCR,HSPA1A/HSPA1B,IDI1,IFITM3,IL6ST,INHBA,IRF7,ISG15,ITGB1,NF2,NID1,PLA1A,SDC1,SERPINB1,SERPINE2,SGK1,SOCS3,SOD3,SPRY4,SQLE,STAT1,STAT3,TBC1D10A,VCAM1,ZC3H12A	3	BREAST OR COLORECTAL CANCER,GASTROINTESTINAL TRACT CANCER,RECRUITMENT OF MYELOID CELLS
6	3.5	7	2	IKBKB,IKBKG	4	CLU,CXCL12,SGK1,STAT3	1	EXPORT OF MOLECULE
7	3.153	24	4	CNTF,JAK1,SOCS3,SP3	17	AKAP12,BCL2L11,CCND1,CD14,DUSP1,IL6ST,IRS2,JAK2,LDLR,SCD,SERPINE1,SGK1,SLC18A3,SLC1A3,STAT1,STAT3,STAT6	3	BINDING OF CONNECTIVE TISSUE CELLS,MIGRATION OF SMOOTH MUSCLE CELLS,TRANSPORT OF MOLECULE
8	2.858	10	2	CD28,RXRA	6	CBL,CCND1,CXCL2,HSPA1A/HSPA1B,SPP1,STAT3	2	ADHESION OF CONNECTIVE TISSUE CELLS,RECRUITMENT OF MYELOID CELLS
9	2.646	11	3	IRS1,KRAS,PTH	7	CCND1,CD44,GNG12,MMP14,PXN,SPP1,Tpm3	1	FORMATION OF FOCAL ADHESIONS
10	2.626	67	6	IFNAR1,Interferon alpha,MAPK1,MAPK14,NOTCH1,PPP1R13L	58	ADAM19,ADAR,ARHGAP11A,AXL,C1S,CCNB1,CCND1,CCND2,CD14,CD44,CD82,CDKN1A,CHST2,CXCL2,CYP51A1,CYP7A1,CYR61,DAB2,DAG1,DUSP1,ENDOD1,FASN,FDPS,FHL2,HMGCR,ID2,IDI1,IFITM3,IL6ST,IRF7,ISG15,ITGA3,ITGA6,ITGB1,JAG1,LDLR,LGALS3,MAPK3,MYRF,NF2,NR2F2,RND3,SDC1,SERPINB1,SERPINE1,SGK1,SHC1,SLC18A3,SOCS3,SPP1,SPRY4,SQLE,STAT1,STAT3,TBC1D10A,TGFB2,TNN,VCAM1	3	BREAST OR COLORECTAL CANCER,GASTROINTESTINAL TRACT CANCER,PROSTATE CANCER
11	2.236	8	1	IRF5	5	CDKN1A,CXCL2,IRF7,ISG15,STAT1	2	INFLAMMATION OF JOINT,ORGANISMAL DEATH
12	2.006	49	4	MAPK1,NOTCH1,PPP1R13L,SKIL	42	ADAM19,ADAR,ARHGAP11A,ATP1B1,C1S,CCNB1,CCND1,CCND2,CD14,CD44,CD82,CDKN1A,CHST2,COL4A1,CXCL12,CYR61,DAB2,DIXDC1,DUSP1,FHL2,ID2,IFITM3,IRF7,ISG15,ITGA3,ITGA6,ITGB1,JAG1,LGALS3,MAPK3,MYOG,MYRF,NR2F2,RND3,SERPINE1,SLC44A1,SPP1,SPRY4,STAT1,TGFB2,TRIM25,ZEB1	3	BREAST OR COLORECTAL CANCER,URINARY TRACT TUMOR,UROGENITAL CANCER
13	2	6	1	Alpha catenin	4	CXCL12,CXCL2,VCAM1,ZYX	1	INTERACTION OF TUMOR CELL LINES
14	1.5	6	1	STAT1	4	AXL,CD14,IFITM3,ISG15	1	ENDOCYTOSIS
15	1.281	52	12	ESR1,INS,INSIG2,LMNB1,MBTPS1,MGEA5,NOTCH1,p70 S6k,PPARGC1B,PPP1R13L,SKIL,SREBF1	39	ADAM19,ATP1B1,CCND1,CCND2,CD44,CDKN1A,CXCL12,CYP51A1,CYR61,FDFT1,FDPS,FLNA,GAS6,GSN,HMGCR,HSD17B7,HSPA1A/HSPA1B,IGFBP5,ITGB1,KRT7,LGALS3,NFAT5,NOTCH2,PDK4,RALA,RERE,SCD,SERPINE1,SLC6A8,SOX9,SPP1,SPTBN1,SRPK2,STAT3,TIMP3,TRAM1,TTN,WISP2,ZEB1	1	URINARY TRACT CANCER
16	1.172	64	1	IFNG	59	ASNS,ATP1B1,BCL2L11,C1R,CCND1,CCND2,CD14,CD44,CDKN1A,CIRBP,CXADR,CXCL12,DDR2,DUSP1,ECE1,ELK1,ETS2,FASN,FHL2,GAS6,HSPA1A/HSPA1B,INHBA,IRF7,IRS2,ISG15,ITGA6,ITGB1,JAG1,JAK2,KARS,KLF6,LAMC2,LGALS3,MMP11,MTSS1,MYOG,PAM,PHGDH,PLA2G2A,PRKCA,RAB12,SDC1,SERPINE1,SLC12A2,SLC1A3,SLC4A2,SLC7A5,SMTN,SOCS3,SPP1,STAT1,STAT3,TGFB2,TIMP3,TNFRSF11B,TRAF6,UNC5B,VCAM1,ZYX	4	CANCER OF SECRETORY STRUCTURE,MALIGNANT NEOPLASM OF MALE GENITAL ORGAN,ORGANIZATION OF ACTIN CYTOSKELETON,PELVIC CANCER
17	1.155	5	1	INHA	3	CCND2,SERPINE1,WISP1	1	CELL PROLIFERATION OF FIBROBLASTS
18	0.8	105	2	IFNG,MYC	100	ABCA7,ABCC1,ACTN1,AKAP12,ANKRD17,ASNS,ATP1B1,AXL,BCL2L11,C1R,CCNB1,CCND1,CCND2,CD14,CD44,CD47,CDKN1A,CHRNB1,CIRBP,CLU,COL4A1,COL4A2,COL6A3,CSDE1,CSRP2,CTNNA1,CXADR,CXCL12,DDR2,DUSP1,ECE1,EIF2S1,EIF4EBP1,EIF4G1,ELK1,ETS2,FASN,FCGRT,FHL2,FLNA,GAS6,HSPA1A/HSPA1B,ID3,INHBA,IRF7,IRS2,ISG15,ITGA3,ITGA6,JAG1,JAK2,KARS,KLF6,KRT7,LAMC2,LGALS3,MAG,MMP11,MYOG,NARS,NBN,NF2,NFAT5,NOP56,NUCB1,PAM,PDCD4,PEX19,P…	3	CANCER OF SECRETORY STRUCTURE,MALIGNANT NEOPLASM OF MALE GENITAL ORGAN,PELVIC CANCER
19	0.733	127	6	CD38,IFNAR1,Interferon alpha,p70 S6k,PTH,TGFB1	119	ADAM10,ADAM19,ADAR,ASNS,ATP2A2,AXL,BCL2L11,C1R,C1S,CCNB1,CCND1,CCND2,CD14,CD28,CD44,CDKN1A,CFH,CFL1,CLCN3,CLU,COL4A1,COL4A2,COL6A3,CXCL12,CYP7A1,DAB2,DAG1,DDR2,DUSP1,ECE1,EIF4EBP1,EIF4H,FASN,FLNA,FNDC3B,FSCN1,GNG12,GSE1,GSN,HIGD1A,HMGCR,HMMR,ID2,ID3,IDI1,IFITM3,IGFBP5,IL33,IL6ST,INHBA,IRF7,ISG15,ITGA11,ITGA6,ITGB1,JAG1,KRT7,LAMC2,LBR,LDLR,LGALS3,MMP11,MMP14,MPP6,MVD,MXD3,MXI1,MYLPF,NDRG4,NF2,NUCB…	2	COLORECTAL CANCER,PROSTATE CANCER
20	0.577	20	7	DBI,FDFT1,FGF4,FOXO3,PPARGC1B,SOCS2,UPF1	12	BCL2L11,CCNB1,CDKN1A,FASN,FDPS,HMGCR,MMP14,NRM,SQLE,STAT3,STAT6,TGFB2	1	INFLAMMATION OF JOINT
21	0.577	5	1	SOCS3	3	CCND1,CDKN1A,STAT3	1	CELL DEATH OF LUNG CANCER CELL LINES
22	0.482	72	2	IFNG,PTEN	69	AKR1C3,ARHGAP5,ASNS,BCL2L11,C1R,CCNB1,CCND1,CCND2,CD14,CD44,CDKN1A,CIRBP,CXADR,CXCL12,DDR2,DUSP1,DYRK1A,ECE1,EIF4EBP1,ETS2,FASN,FDFT1,FHL2,GAS6,HSPA1A/HSPA1B,IFRD1,IGFBP5,INHBA,INPPL1,IRF7,IRS2,ISG15,ITGA6,JAG1,JAK2,KARS,KLF6,LAMC2,LGALS3,MMP11,MMP14,MYOG,PAM,PAPOLA,PDCD4,PLA2G2A,PRKCA,PSCA,RAB12,RBBP6,RETREG3,SERPINE1,SLC12A2,SLC1A3,SLC4A2,SLC7A5,SMARCA4,SMTN,SOCS3,SOX4,SPP1,STAT1,STAT3,TIMP3,TN…	1	PELVIC CANCER
23	0	11	1	PPARGC1B	8	CCND1,FASN,FDFT1,FDPS,HMGCR,PDK4,SCD,SQLE	2	INFLAMMATION OF JOINT,URINARY TRACT CANCER
24	-4.899	8	1	STAT4	6	BCL2L11,CXCL2,ERRFI1,ISG15,SOCS3,STAT1	1	RHEUMATIC DISEASE
25	-5.367	7	1	POR	5	CYP7A1,LDLR,LSS,SCD,Scd2	1	EXPORT OF MOLECULE
26	-5.669	9	1	INSIG1	7	CXCL2,FASN,FDFT1,FDPS,HMGCR,LDLR,SQLE	1	INFLAMMATION OF JOINT
27	-5.669	9	1	SREBF2	7	CDKN1A,FASN,FDFT1,FDPS,HMGCR,LDLR,SQLE	1	INFLAMMATION OF JOINT
28	-6	6	1	miR-1-3p (and other miRNAs w/seed GGAAUGU)	4	AXL,CLCN3,GAK,SYNE1	1	ENDOCYTOSIS
29	-6.124	8	1	SCAP	6	FASN,FDFT1,FDPS,HMGCR,LDLR,SQLE	1	INFLAMMATION OF JOINT
30	-6.708	7	1	MYC	5	AKAP12,CD44,ITGB1,NF2,SPP1	1	ADHESION OF FIBROBLAST CELL LINES
31	-8.257	48	1	OSM	46	ABCC1,AKR1C3,ASAH1,ASNS,BLMH,C1R,C1S,CCND1,CCND2,CDKN1A,CSNK2A2,CXADR,CXCL12,CXCL2,CYP1B1,EIF4EBP1,ETFB,ETS2,FASN,ID2,IL33,IL6ST,IRF7,JAG1,LDLR,MYCBP2,OGDH,PDCD4,PDLIM5,RAD23A,RBFOX2,RORA,SERPINA3,SERPINB1,SERPINE1,SNAPC3,SOCS3,STAT1,STAT3,SYNE1,TIMP3,TM7SF2,TNFRSF11B,UBQLN2,VCAM1,XDH	1	NEOPLASIA OF EPITHELIAL TISSUE
32	-8.66	5	1	NPPB	3	FDFT1,HMGCR,LDLR	1	INFLAMMATION OF JOINT
33	-23.671	77	1	IFNG	75	AGRN,ARNT2,ASNS,ATG3,ATP1B1,ATP2A2,BCL2L11,BTG1,C1R,CCND1,CCND2,CD14,CD44,CDKN1A,CIRBP,CXADR,CXCL12,CXCL2,DDR2,DUSP1,ECE1,ELK1,ETS2,FASN,FHL2,FTH1,GAS6,GJA5,HMGCR,HSPA1A/HSPA1B,IDI1,IFITM3,INHBA,IRF7,IRS2,ISG15,ITGA6,ITGB1,JAG1,JAK2,KARS,KLF6,LAMC2,LGALS3,MMP11,MTSS1,MYOG,PAM,PHGDH,PLA2G2A,PRKCA,RAB12,SBNO2,SDC1,SERPINE1,SLC12A2,SLC1A3,SLC4A2,SLC7A5,SMTN,SOCS3,SOD3,SPP1,SQLE,STAT1,STAT3,STAT6,TBC…	1	NON-MELANOMA SOLID TUMOR
